# Supplementary material
Source: PubMed Central journal article supplement (PMC6103450)

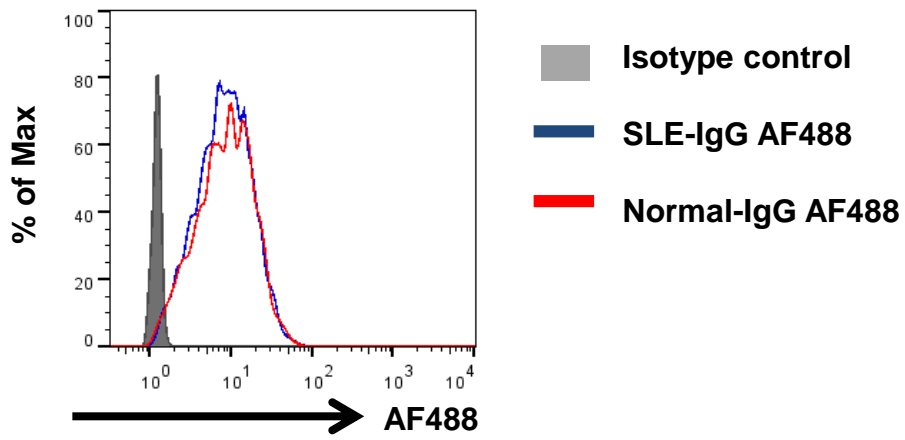

**Supple. Fig.1**

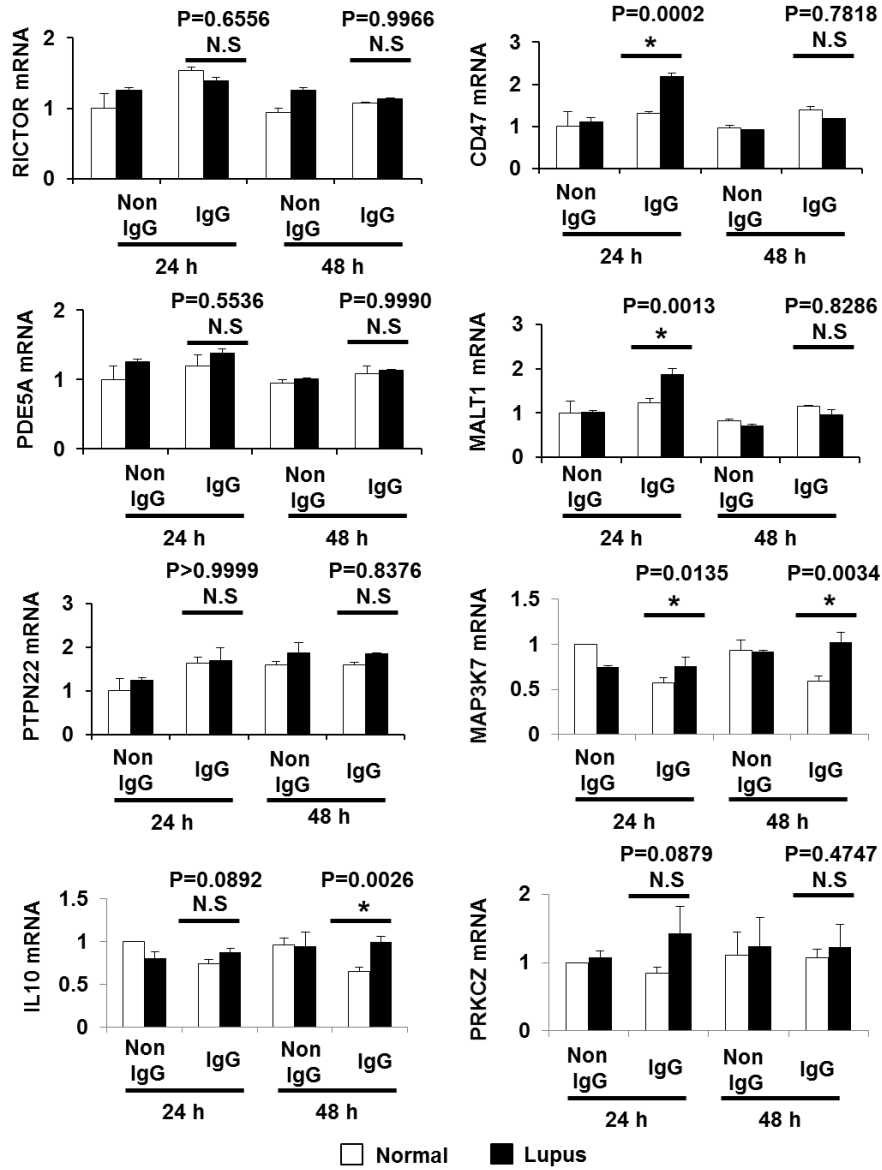

**Supple. Fig.2**

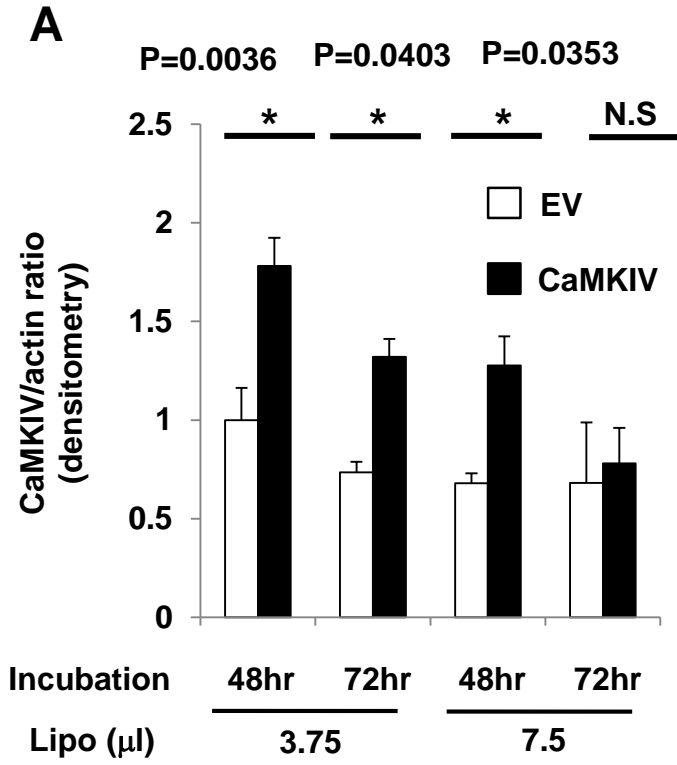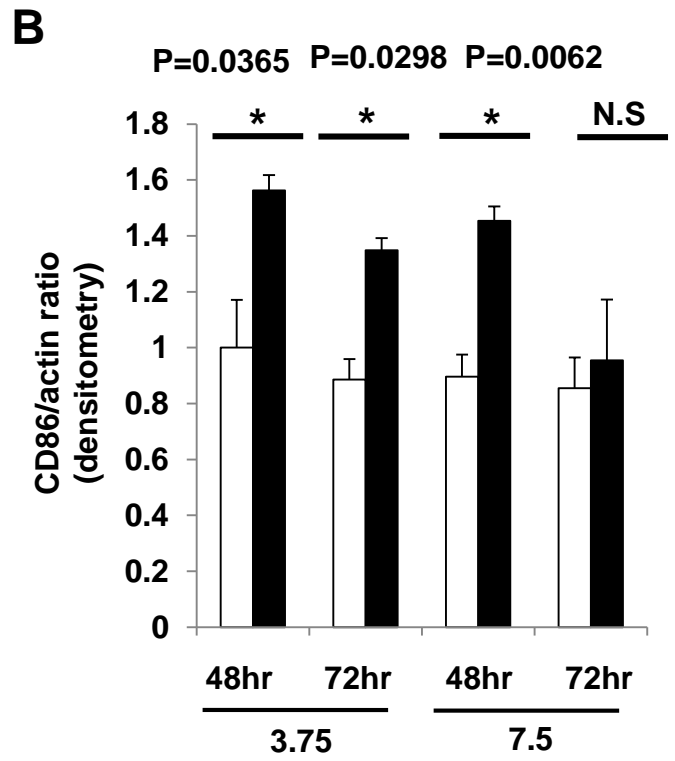

**Supple. Fig.3**

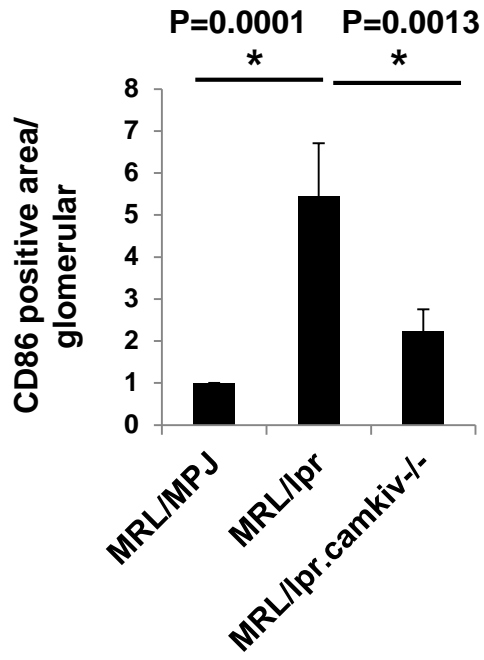

**Supple. Fig.4**

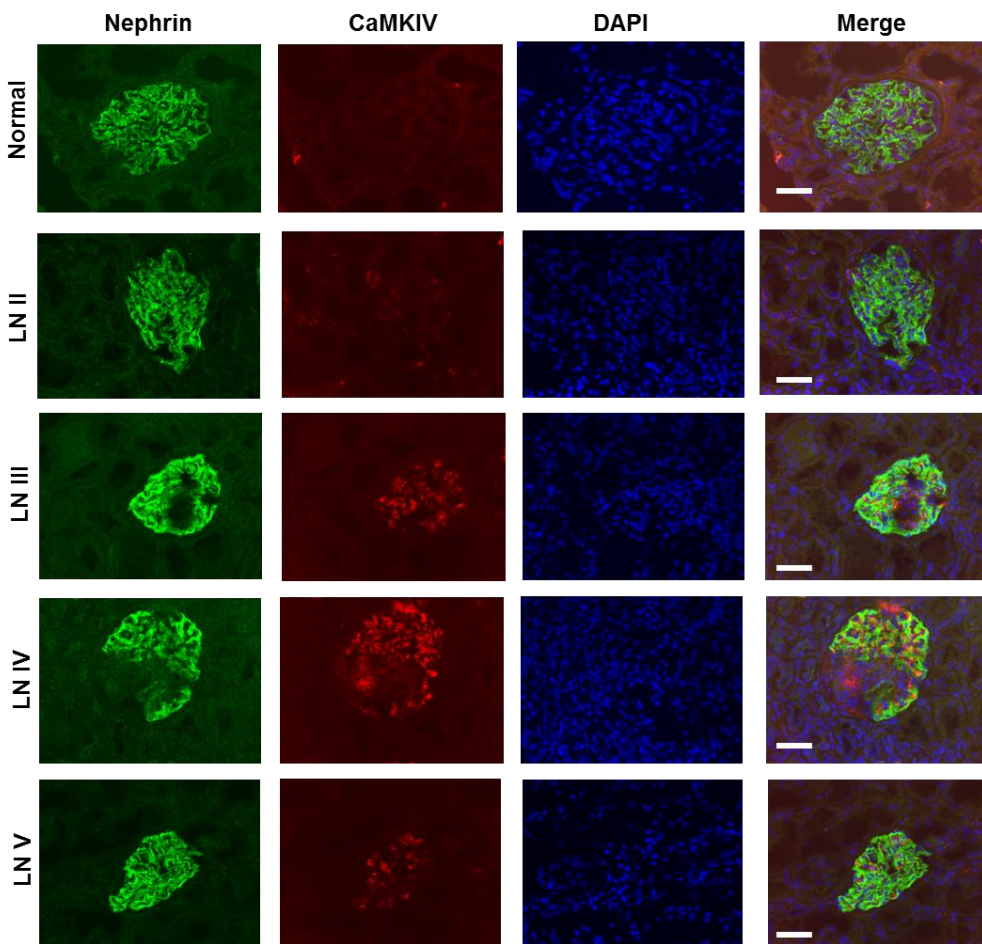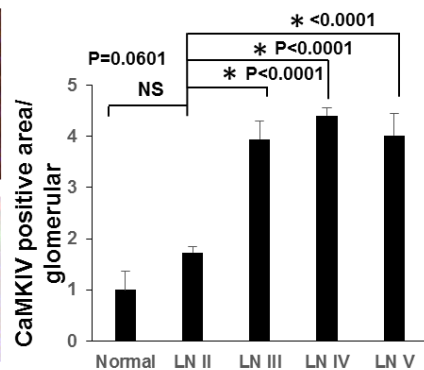

**Supple. Fig.5**

Supplement: NIHMS760075-supplement-0003.pdf [file NIHMS760075-supplement-0003.pdf]
